# Supplementary material for: Bace1 modulates myelination in the central and peripheral nervous system
Source: Springer Nature journal article supplement (doi:10.1038/nn1797), 2006-11-12
Supplement: 41593_2006_BFnn1797_MOESM1_ESM.pdf [file 41593_2006_BFnn1797_MOESM1_ESM.pdf]

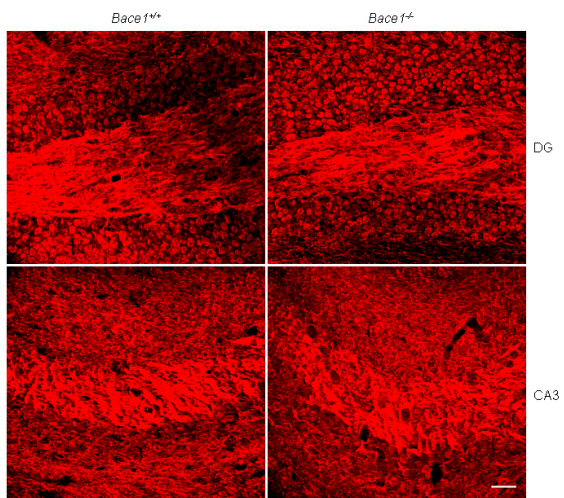

Supplemental Figure 1

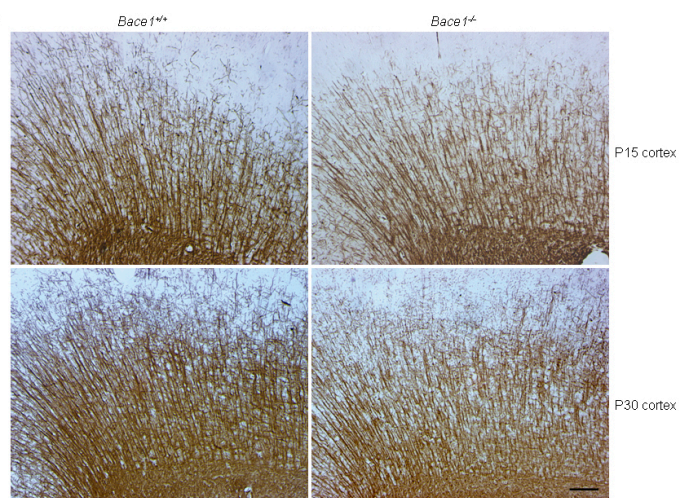

Supplemental Figure 1

Suppl Figure 1 Reduced myelination in BACE1-null central nervous system. (a) Axonal neurofilaments are normal in BACE1-null mice. Brain sections from 6-month old BACE1-null mice and corresponding wild type littermates were double-labeled with neurofilament (SMI31) and MBP antibodies. Brain sections labeled for only MBP immunoreactivity were presented in Fig. 1a. The signal of axonal neurofilaments on the same section showed no obvious changes between BACE1-null mice and wild type littermate controls. Scale bar, 30  $\mu$ m. (b) Brain sections from P15 (upper) and P30 (lower) were examined by a standard immunohistochemical staining procedure to test for PLP levels in BACE1-null mice and corresponding wild type littermate controls. Reduced PLP immunoreactivity is visible in the frontal cortex of BACE1-null mice. Scale bar, 250  $\mu$ m.
