# Supplementary material for: Bace1 modulates myelination in the central and peripheral nervous system
Source: Springer Nature journal article supplement (doi:10.1038/nn1797), 2006-11-12
Supplement: 41593_2006_BFnn1797_MOESM2_ESM.pdf [file 41593_2006_BFnn1797_MOESM2_ESM.pdf]

**a**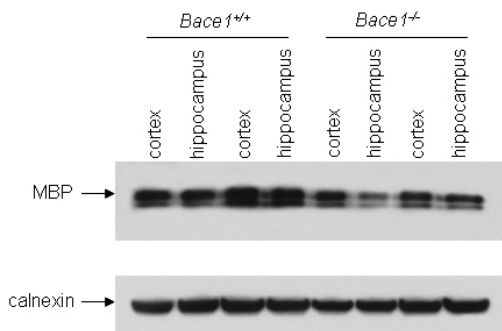**b**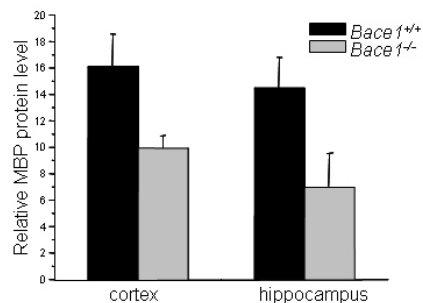**c**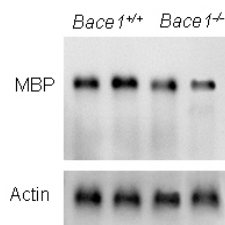

Suppl Figure 2 MBP is reduced in the cortex and hippocampus of BACE1-null mice. (a) MBP expression in the cerebral cortex and hippocampus of BACE1-null mice and corresponding wild type littermate controls at the age of eight months (n=2) was measured via Western blot, with calnexin used as a loading control. (b) Quantification of protein levels showed that MBP expression was reduced by 38% in the cerebral cortex and 52% in the hippocampus of BACE1-null mice compared to wild type controls. (c) Total RNA was isolated from cerebral cortices of two BACE1-null mice and their corresponding wild type littermates for a standard Northern blot analysis. A DIG labeled probe corresponding to the MBP coding region was prepared for detection of MBP mRNA (~1.8kb). Actin probe was provided in the DIG Northern Starter kit (Roche).
