# Supplementary material for: Bace1 modulates myelination in the central and peripheral nervous system
Source: Springer Nature journal article supplement (doi:10.1038/nn1797), 2006-11-12
Supplement: 41593_2006_BFnn1797_MOESM3_ESM.pdf [file 41593_2006_BFnn1797_MOESM3_ESM.pdf]

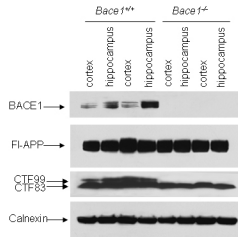

Suppl Figure 3 Validation of abolished processing of APP in BACE1-null mice. The hippocampal and cerebral cortical protein extracts from two BACE1-null mice and their wild type controls were examined for the expression of BACE1 and APP. The C-terminal APP antibody recognizes full-length APP, CTF83 (cleaved product by  $\alpha$ -secretase) and CTF99 (cleaved product by BACE1). Anti-calnexin antibody was used as a loading control. BACE1 protein is completely absent in BACE1-null mice, and its cleavage product CTF99 was also abolished.
